# Supplementary material
Source: PubMed Central journal article supplement (PMC4949205)

# Silver staining for Fig. 2f

f

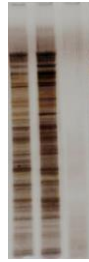

Ct- - +Trypsin  
CM  $\alpha$ -CM

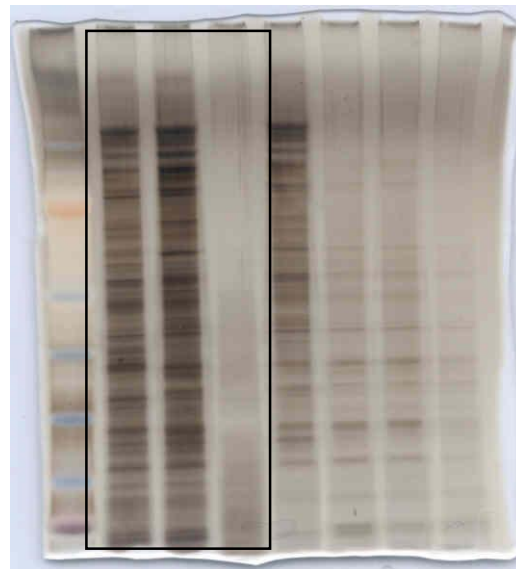

# WBs for Fig. 3e

e

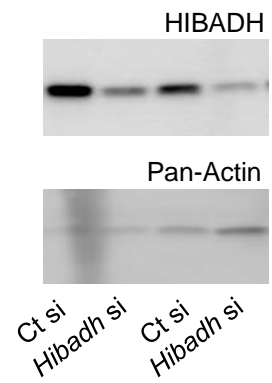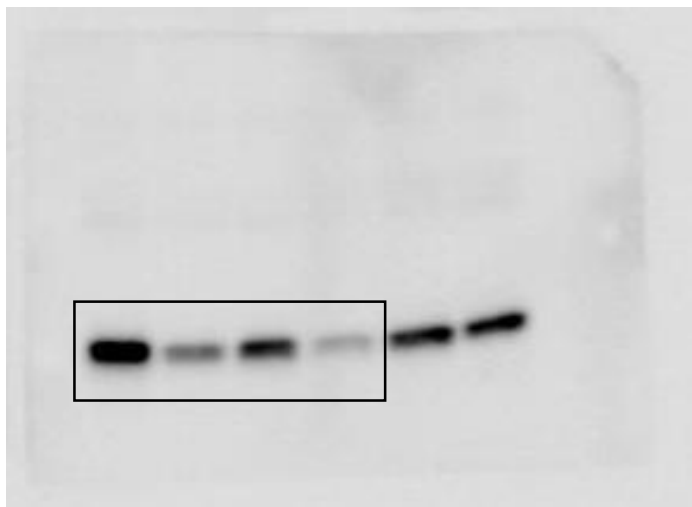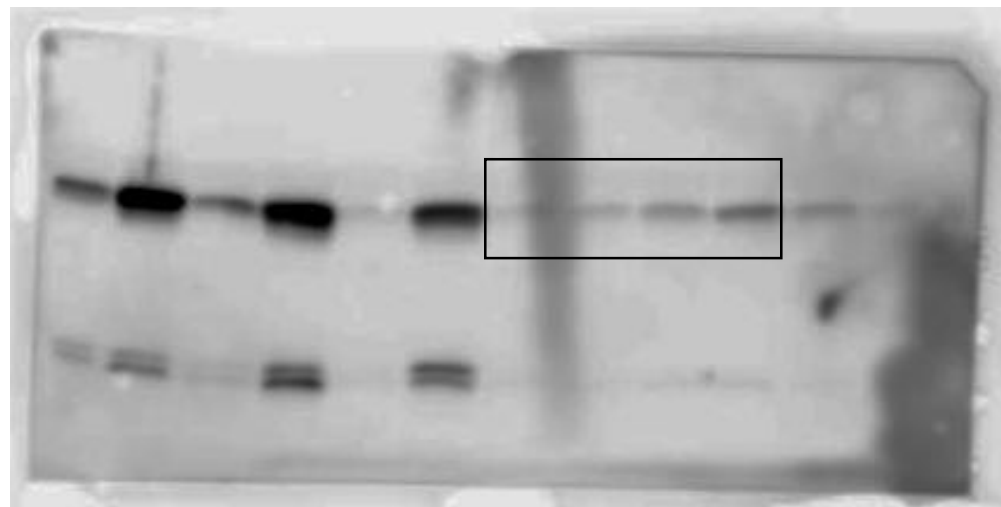

## WBs for Fig. 4h

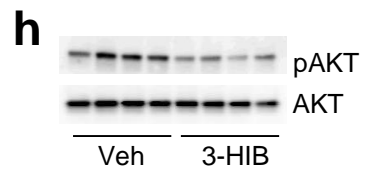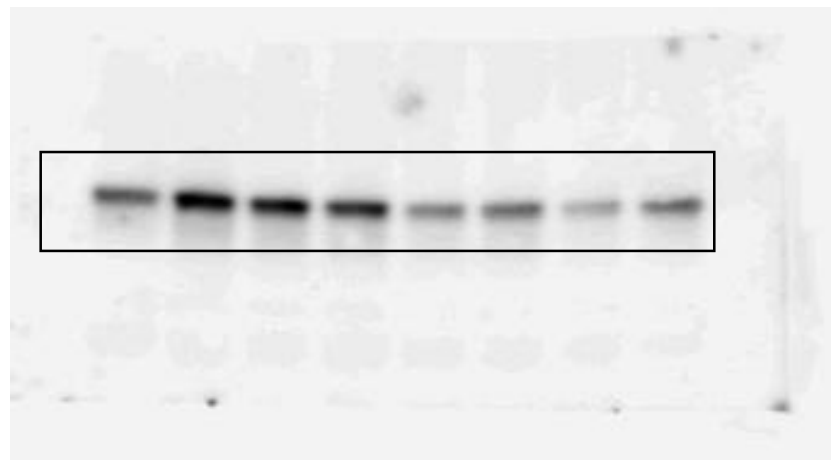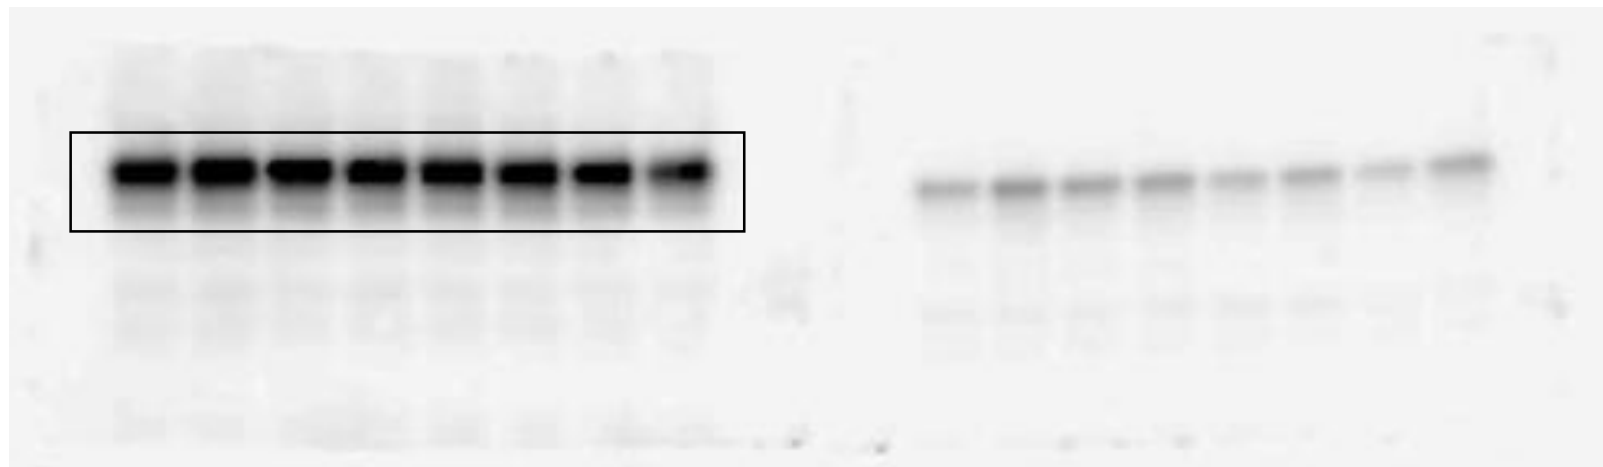

# WBs for Supplementary Fig. 3b

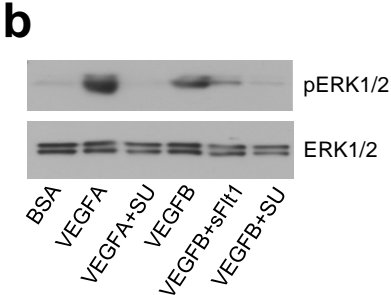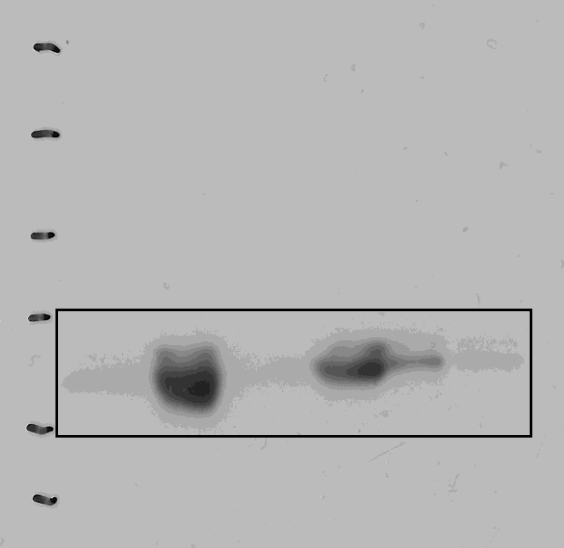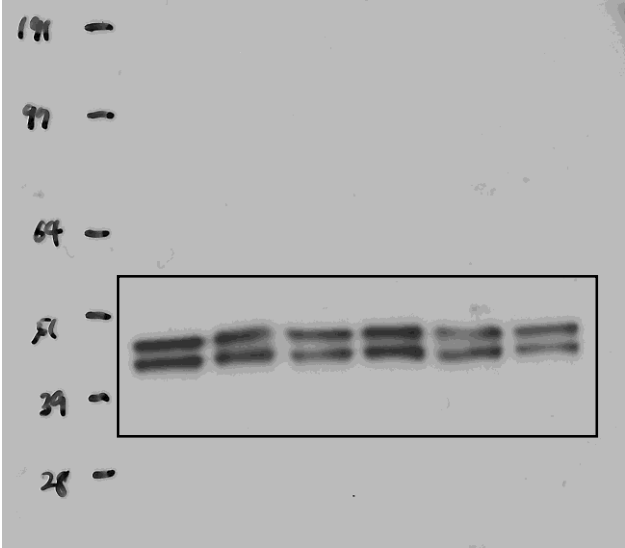

# WBs for Supplementary Fig. 8a

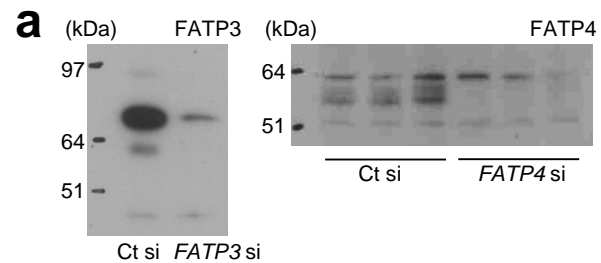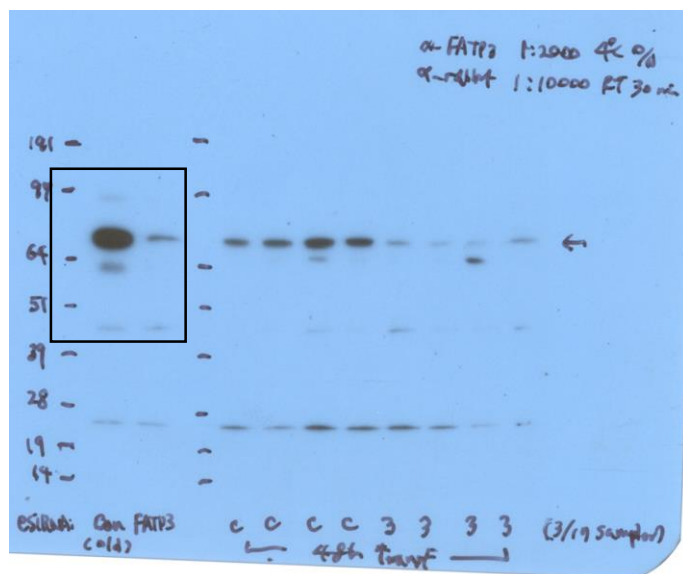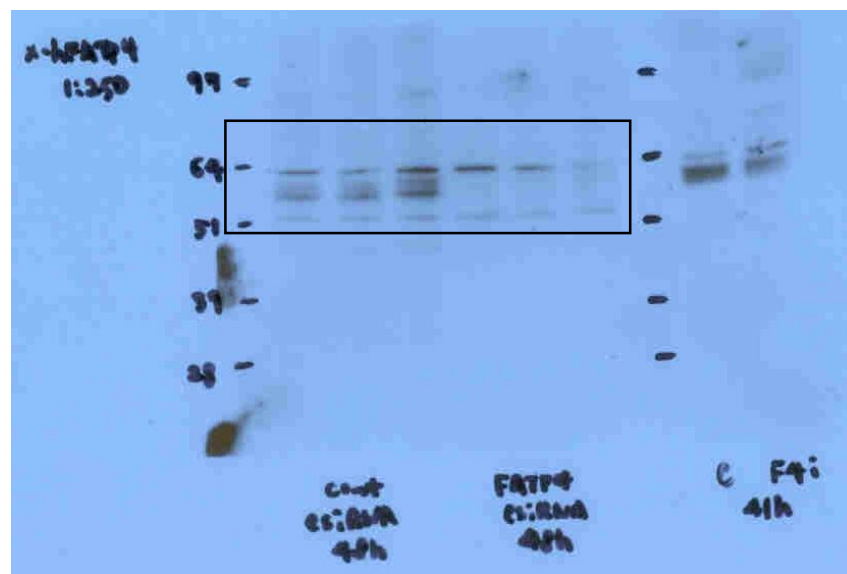

## WBs for Supplementary Fig. 8j

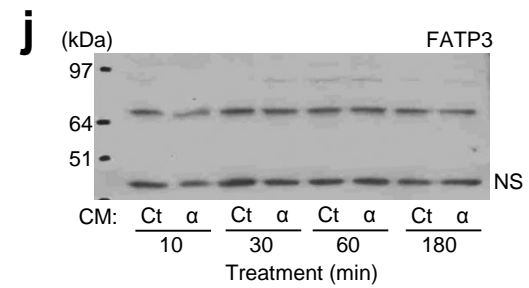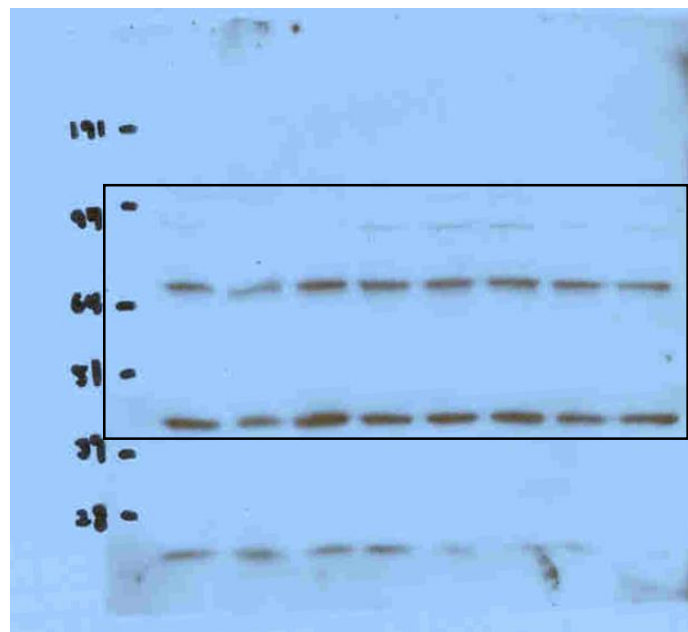

# WBs for Supplementary Fig. 8k

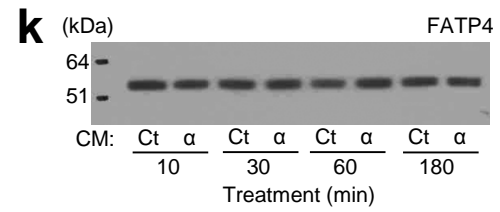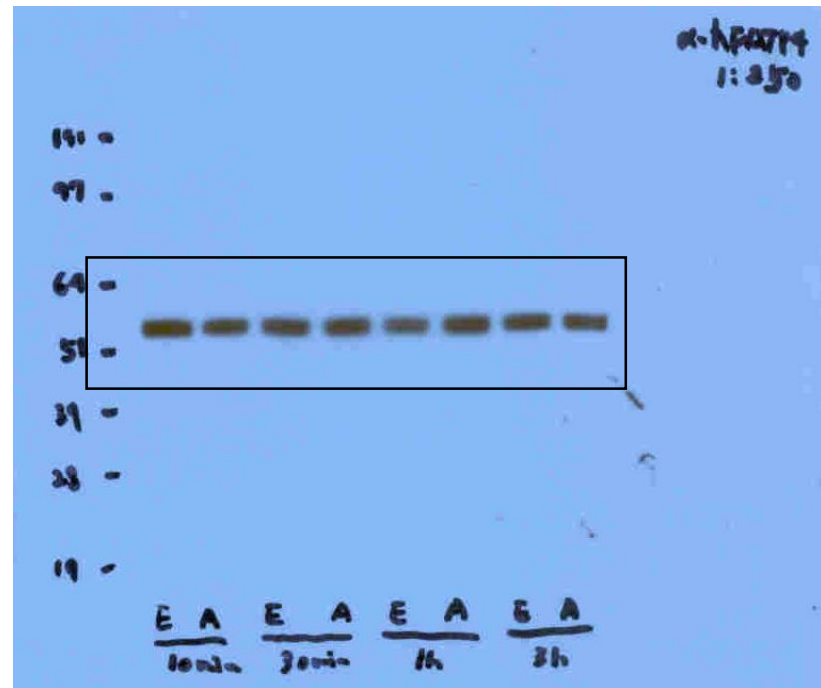

# WBs for Supplementary Fig. 10g

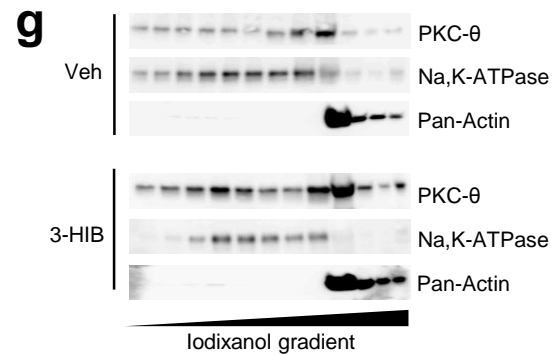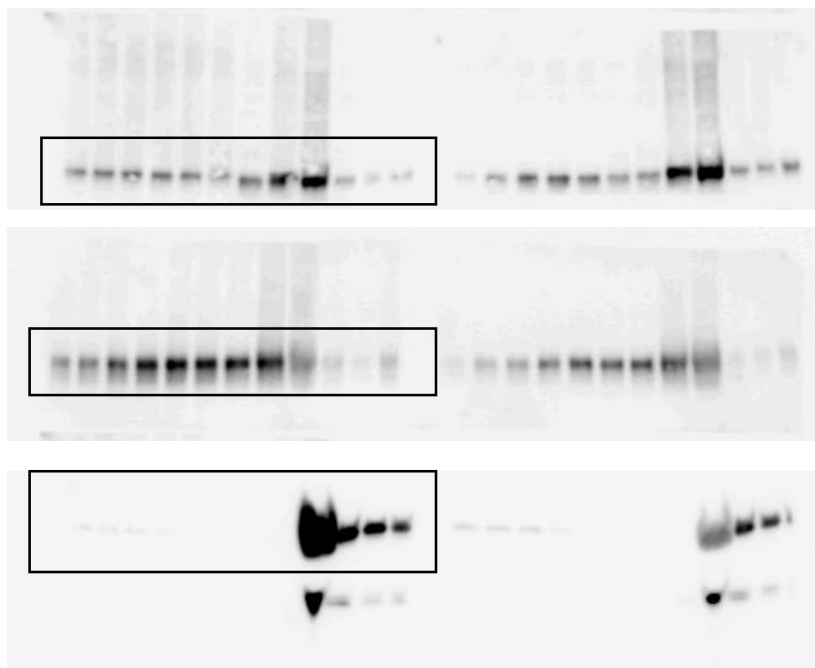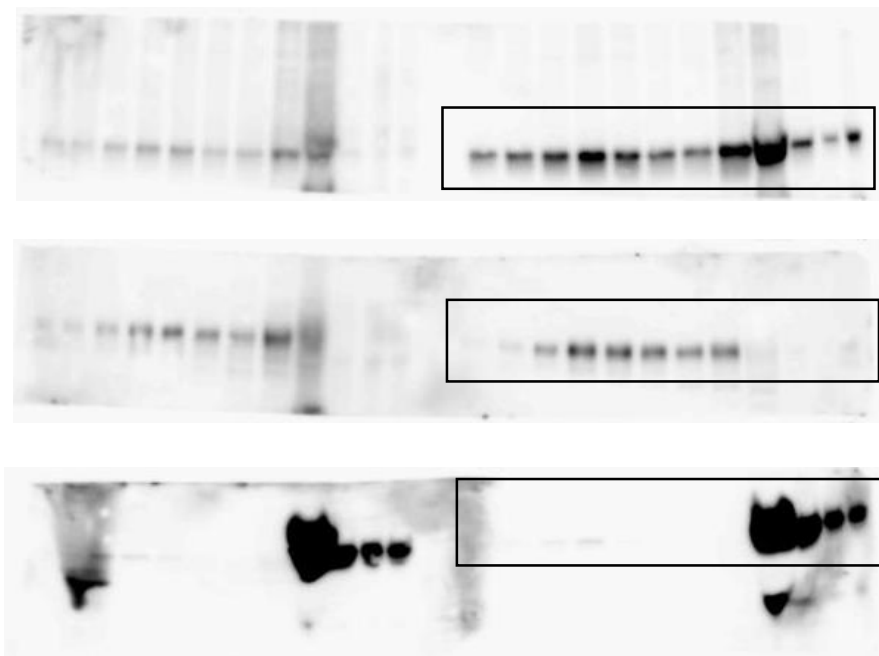



# WBs for Supplementary Fig. 10n

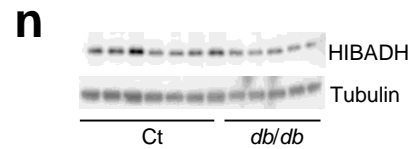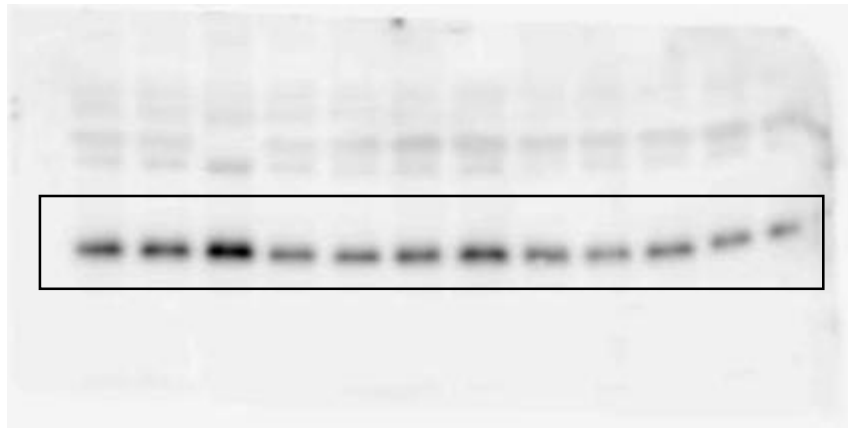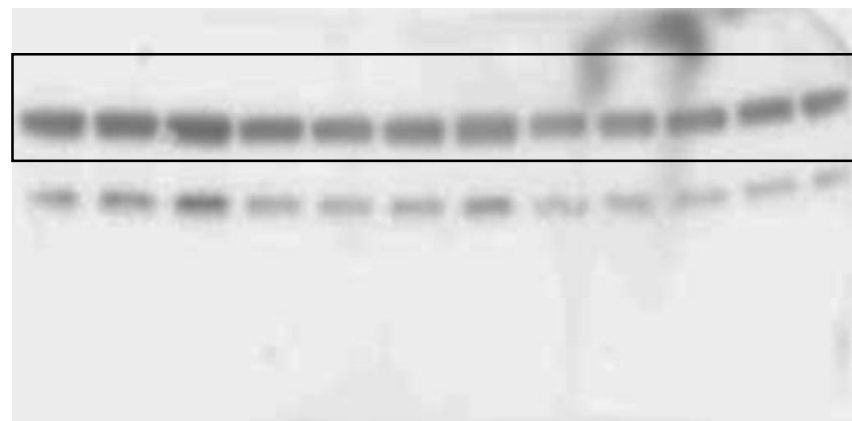

Supplement: NIHMS758301-supplement-2.pdf [file NIHMS758301-supplement-2.pdf]
